# Supplementary material
Source: Springer Nature journal article supplement (https://www.springermedizin.de/resource/supplementary/12986_2010_316_MOESM2_ESM.pdf/25655816)

**A (LPS-Challenge)**

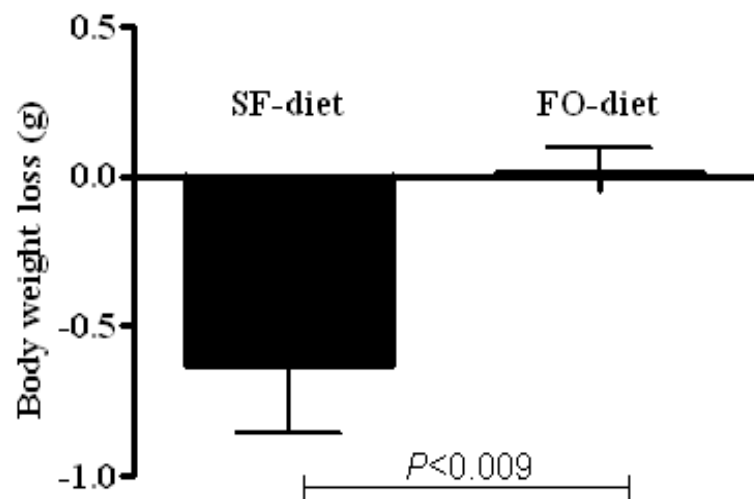

**B (Overnight fasting)**

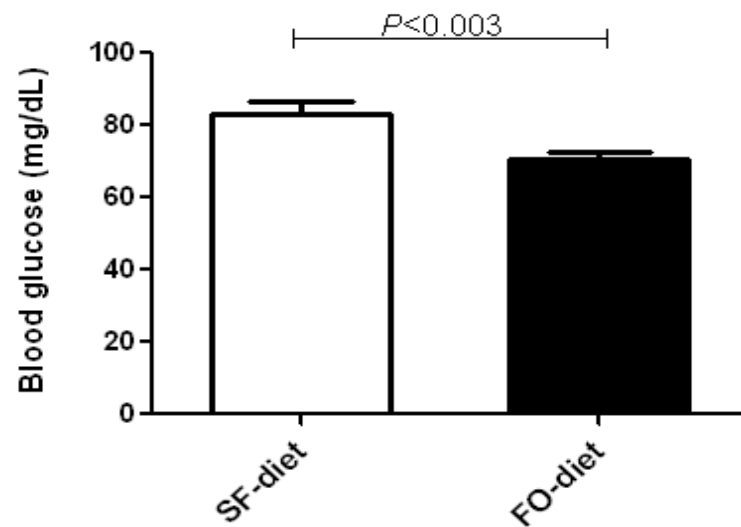

**C (LPS-challenge)**

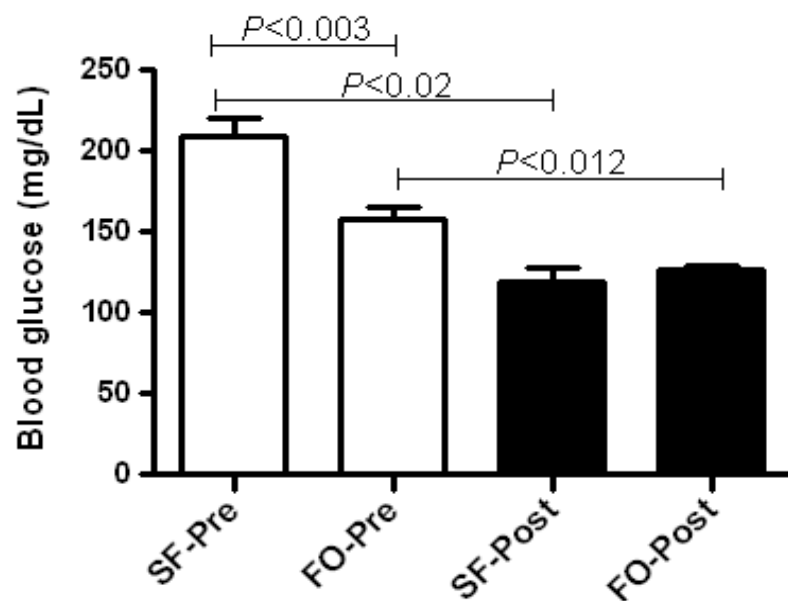

**D (LPS-challenge)**

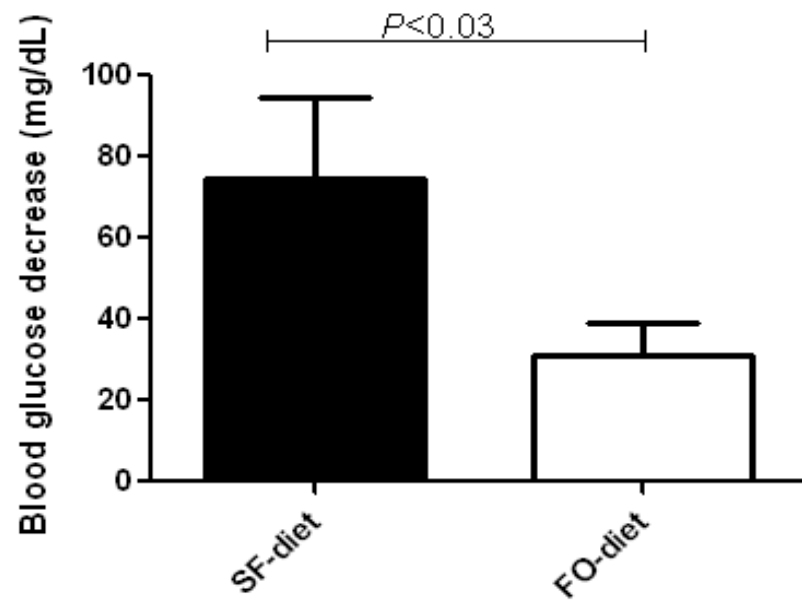

Supplement: MOESM2 [file 25655816]
